# Supplementary material for: Lineage tracing in the adult mouse corneal epithelium supports the limbal epithelial stem cell hypothesis with intermittent periods of stem cell quiescence
Source: PubMed Central journal article supplement (PMC4686565; doi:10.1016/j.scr.2015.10.016), 2015-11

### A Central end of stripes

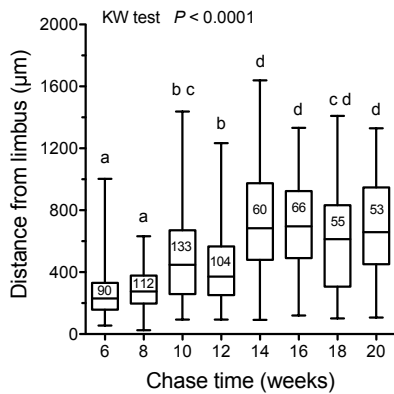

### B Stripes > 500 $\mu\text{m}$ from limbus

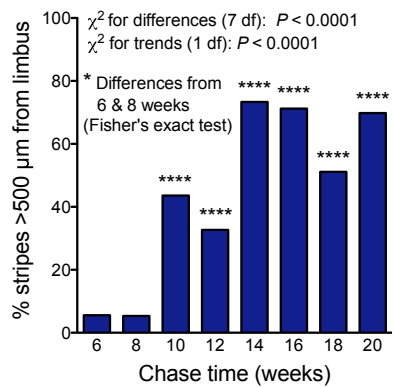

### C Stripes > 1000 $\mu\text{m}$ from limbus

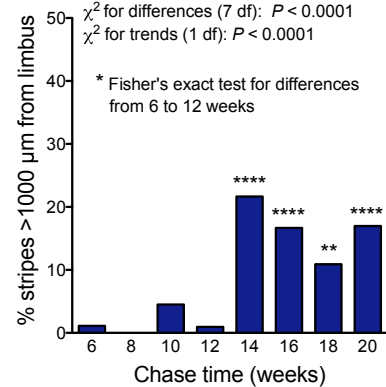

### D Extension of stripes

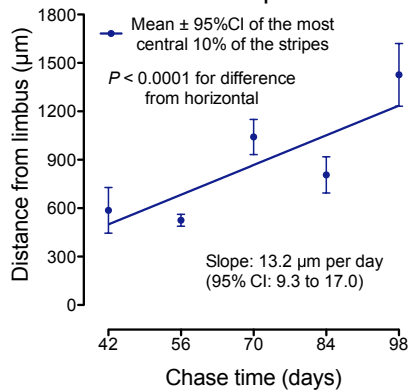

### E LC stripe frequency

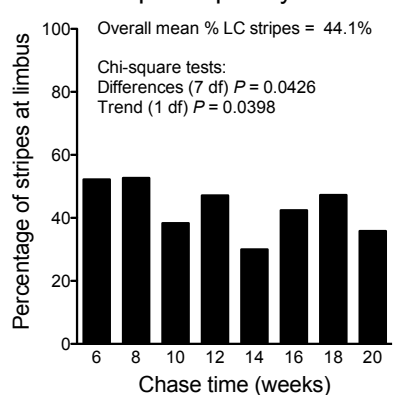

### F Peripheral end of CC stripe

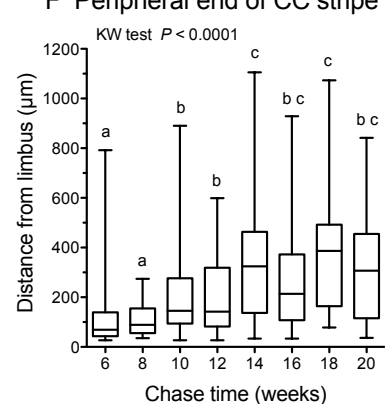

### G Distribution of central end of stripes

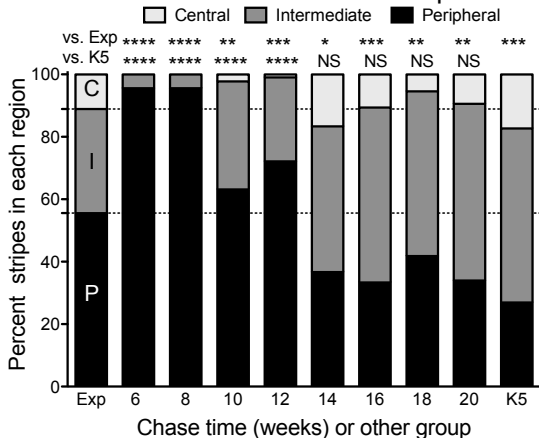

Supplement: mmc3.pdf [file mmc3.pdf]
