# Supplementary material for: Lineage tracing in the adult mouse corneal epithelium supports the limbal epithelial stem cell hypothesis with intermittent periods of stem cell quiescence
Source: PubMed Central journal article supplement (PMC4686565; doi:10.1016/j.scr.2015.10.016), 2015-11

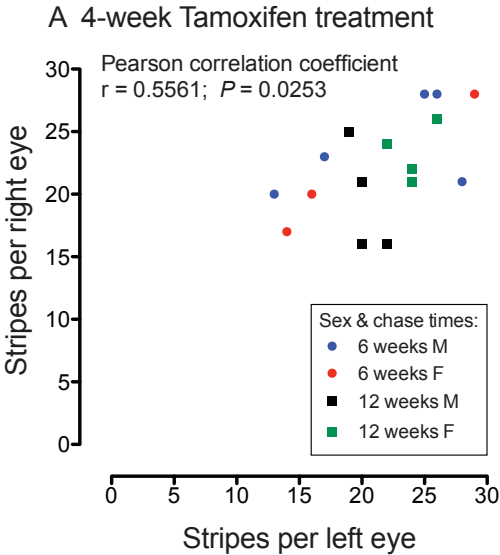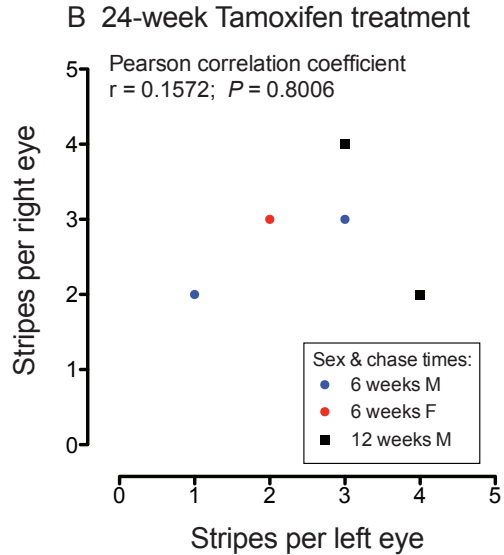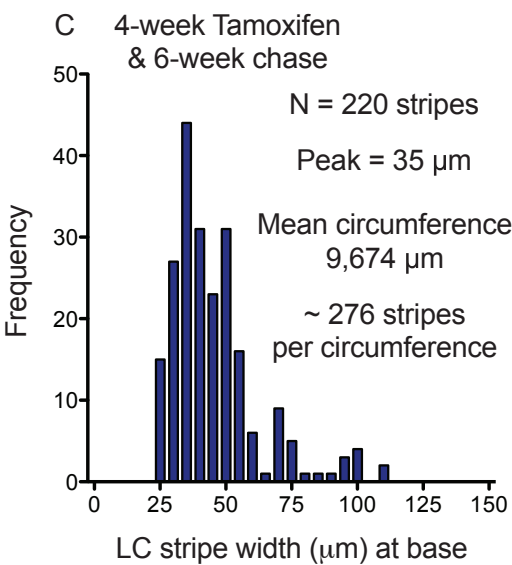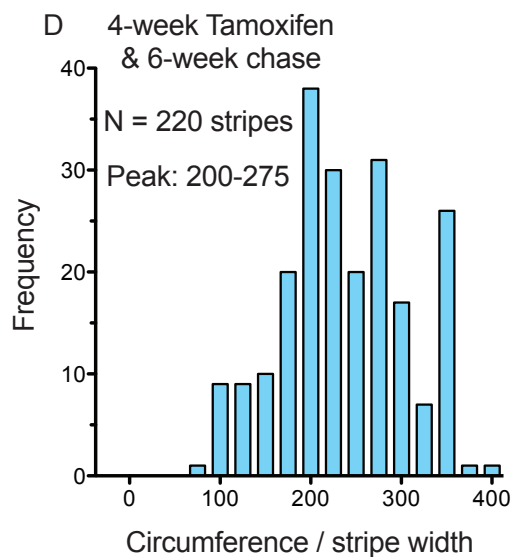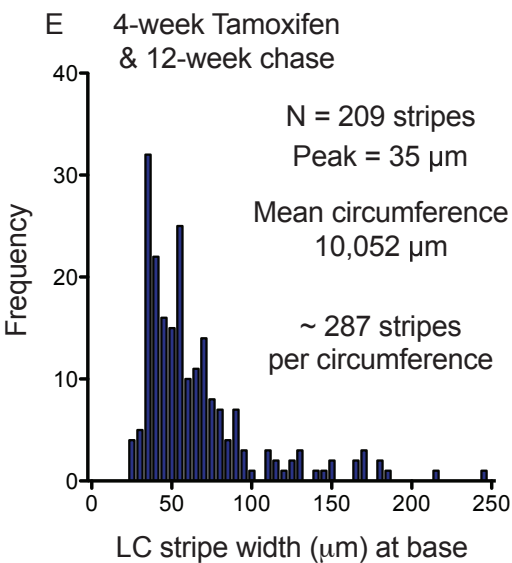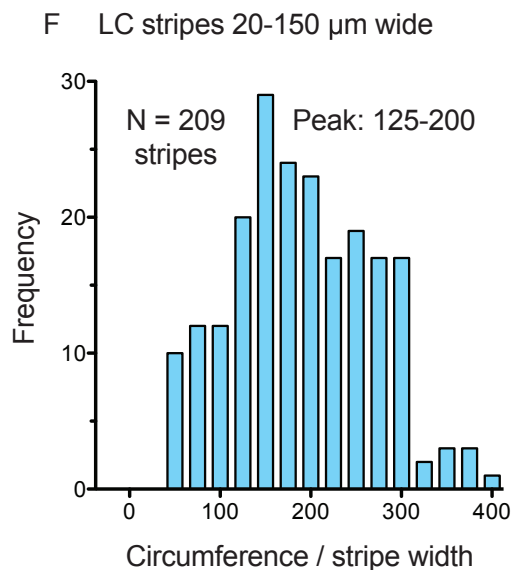

Supplement: mmc5.pdf [file mmc5.pdf]
